# Supplementary material for: Acute motor deficit and subsequent remyelination‐associated recovery following internal capsule demyelination in mice
Source: PubMed Central journal article supplement (PMC8048697; doi:10.1111/jnc.15142), 2020-08-14
Supplement: JNC-156-917-s001.pdf [file JNC-156-917-s001.pdf]

## Supporting information

### **Acute motor deficit and subsequent remyelination-associated recovery following internal capsule demyelination in mice**

**Short title:** *Analysis of motor function in mice after internal capsule demyelination*

Reiji Yamazaki<sup>1,2</sup>, Nobuhiko Ohno<sup>2</sup> and Jeffrey K. Huang<sup>1,3</sup>

<sup>1</sup>Department of Biology and Center for Cell Reprogramming, Georgetown University, Washington, DC 20057, USA

<sup>2</sup>Department of Anatomy, Division of Histology and Cell Biology, School of Medicine, Jichi Medical University, Shimotsuke, Japan :

<sup>3</sup>Correspondence should be addressed to J.K.H. ([jh1659@georgetown.edu](mailto:jh1659@georgetown.edu))

This file includes:  
Tables S1-S5  
Figures S1-S4

## Supplementary Tables

**Table S1. Mice used in this study**

|                             | Injection Type | Task            | Timepoints Analyzed   | Total Mice Used | Sac'd at 3dpl for Immuno | Sac'd at 7dpl for Immuno | Sac'd at 28dpl for immuno | Wire Hanging/<br>Cylinder Tests | Tape Removal/<br>Ladder Tests | Excluded | Figure                                         |
|-----------------------------|----------------|-----------------|-----------------------|-----------------|--------------------------|--------------------------|---------------------------|---------------------------------|-------------------------------|----------|------------------------------------------------|
| <b>Initial Testing</b>      | LPC            | Wire Hang/NR    | Pre and 7dpl          | 8               |                          | 8                        |                           |                                 |                               |          | Fig 2                                          |
|                             |                |                 |                       |                 |                          |                          |                           |                                 |                               |          |                                                |
| <b>Immuno/<br/>Behavior</b> | LPC            | Behavior/Immuno | Pre, 7, 14, 21, 28dpl | 39              | 3                        | 5                        | 5 (after behavioral test) | 17                              | 14                            |          | Fig 3, 7 (behavior); Fig. 4, 5, 6, S4 (immuno) |
|                             | PBS            | Behavior/Immuno | Pre, 7, 14, 21, 28dpl | 23              | 0                        | 0                        | 5 (after behavioral test) | 13                              | 10                            |          | Fig 3, 7 (behavior); Fig. 4, 5, 6, S4 (immuno) |
|                             | ET1            | Behavior/Immuno | Pre, 7, 14, 21, 28dpl | 18              | 3                        | 5                        | 5 (after behavioral test) | 8                               |                               | 2        | Fig 3, 7 (behavior); Fig. 4, 5, 6, S4 (immuno) |
|                             |                |                 |                       |                 |                          |                          |                           |                                 |                               |          |                                                |
| <b>Total Mice</b>           |                |                 |                       | 88              |                          |                          |                           |                                 |                               |          |                                                |

**Table S2. Wire hanging test**

| Hanging time (seconds) | PBS           | LPC            | ET1            |
|------------------------|---------------|----------------|----------------|
| Pre                    | 185.0 ± 53.42 | 189.6 ± 57.46  | 195.4 ± 82.32  |
| 7dpi                   | 192.7 ± 49.10 | 99.29 ± 63.62  | 66.0 ± 29.43   |
| 14dpi                  | 223.1 ± 96.69 | 158.30 ± 67.20 | 116.9 ± 47.37  |
| 21dpi                  | 236.5 ± 76.69 | 209.40 ± 63.69 | 119.6 ± 104.60 |
| 28dpi                  | 255.9 ± 65.69 | 249.90 ± 61.87 | 127.6 ± 101.30 |

Graph indicated the mean ± standard deviation (SD) obtained from each eight mice (PBS; n=13, LPC; n=17, ET1; n=8). Asterisks indicate \*P<0.05, \*\*P<0.01. \*\*\*P<0.001 versus PBS, #P<0.05 versus Pre (baseline) by Tukey-Kramer test after two-way ANOVA.

**Table S3. Cylinder test**

| LFO (sec) | Pre           | 7dpl          | 14dpl         | 21dpl         | 28dpl         |
|-----------|---------------|---------------|---------------|---------------|---------------|
| PBS       | 19.33 ± 11    | 21.15 ± 11.24 | 20.57 ± 11.82 | 18.31 ± 11.43 | 19.82 ± 20.17 |
| LPC       | 22.25 ± 9.544 | 19.71 ± 9.514 | 21.32 ± 8.358 | 19.04 ± 11.2  | 19.88 ± 11.61 |

| RFO (sec) | Pre           | 7dpl          | 14dpl         | 21dpl         | 28dpl         |
|-----------|---------------|---------------|---------------|---------------|---------------|
| PBS       | 20.78 ± 10.64 | 21.84 ± 15.57 | 22.10 ± 11.41 | 20.02 ± 11.18 | 22.05 ± 13.48 |
| LPC       | 18.79 ± 11.7  | 33.55 ± 10.88 | 28.74 ± 16.32 | 23.89 ± 10.55 | 20.77 ± 13.58 |

| Both (sec) | Pre           | 7dpl          | 14dpl         | 21dpl         | 28dpl         |
|------------|---------------|---------------|---------------|---------------|---------------|
| PBS        | 59.88 ± 7.872 | 57.01 ± 10.74 | 57.33 ± 7.667 | 61.67 ± 9.107 | 58.13 ± 13.98 |
| LPC        | 58.95 ± 7.05  | 46.75 ± 9.045 | 49.95 ± 13.26 | 57.06 ± 2.506 | 59.35 ± 9.388 |

Quantification of the ratio of right or left or both forepaw usage. Graph indicated the mean ± standard deviation (SD) obtained from each group (PBS; n=13, LPC; n=17). Two-way ANOVA, Tukey-Kramer test. \*P<0.05 versus PBS. #P<0.05 versus Pre (baseline).

**Table S4. Adhesive tape removal test**

| Right-motor (sec) | Pre           | 7dpl          | 14dpl         | 21dpl         | 28dpl         |
|-------------------|---------------|---------------|---------------|---------------|---------------|
| PBS               | 18.75 ± 8.439 | 20.70 ± 7.364 | 15.55 ± 4.728 | 13.42 ± 5.076 | 16.02 ± 5.094 |
| LPC               | 23.61 ± 6.599 | 18.84 ± 10.22 | 20.36 ± 8.154 | 12.24 ± 7.354 | 12.09 ± 6.825 |

| Left-motor (sec) | Pre           | 7dpl          | 14dpl         | 21dpl         | 28dpl         |
|------------------|---------------|---------------|---------------|---------------|---------------|
| PBS              | 16.65 ± 4.079 | 18.97 ± 6.719 | 13.15 ± 5.892 | 12.07 ± 6.467 | 13.68 ± 5.952 |
| LPC              | 17.14 ± 6.895 | 43.96 ± 23.07 | 37.84 ± 20.76 | 15.80 ± 6.918 | 14.23 ± 6.415 |

Graph indicated the mean ± standard deviation (SD) obtained from each group (PBS; n=10, LPC; n=14). Two-way ANOVA, Tukey-Kramer test. \*\*\*P<0.001 versus PBS. ###P<0.001 versus Pre (baseline).

**Table S5. Horizontal ladder test**

| Total slips | Pre          | 7dpl         | 14dpl        | 21dpl        | 28dpl        |
|-------------|--------------|--------------|--------------|--------------|--------------|
| PBS         | 3.34 ± 1.807 | 4.21 ± 1.931 | 4.44 ± 1.483 | 3.89 ± 1.122 | 4.57 ± 1.382 |
| LPC         | 3.92 ± 1.983 | 9.78 ± 3.323 | 6.64 ± 1.896 | 5.12 ± 1.831 | 4.24 ± 1.829 |

Graph indicated the mean ± standard deviation (SD) obtained from each group (PBS; n=10, LPC; n=14).

| Hindlimb | PBS           | LPC            |
|----------|---------------|----------------|
| 7dpl-RH  | 0.99 ± 0.5801 | 1.75 ± 0.8645  |
| 7dpl-LH  | 1.23 ± 0.6075 | 3.49 ± 1.618   |
| 14dpl-RH | 1.14 ± 0.756  | 1.26 ± 0.6675  |
| 14dpl-LH | 1.17 ± 0.7558 | 2.09 ± 0.7995  |
| 21dpl-RH | 0.90 ± 0.5185 | 1.22 ± 0.7298  |
| 21dpl-LH | 1.09 ± 0.4202 | 1.479 ± 0.7138 |

Graph indicated the mean ± standard deviation (SD) obtained from each group (PBS; n=10, LPC; n=14). two-way ANOVA, Tukey-Kramer test. \*\*\*P<0.001 versus PBS. ###P<0.001 versus RH (baseline).

Supplementary Figures

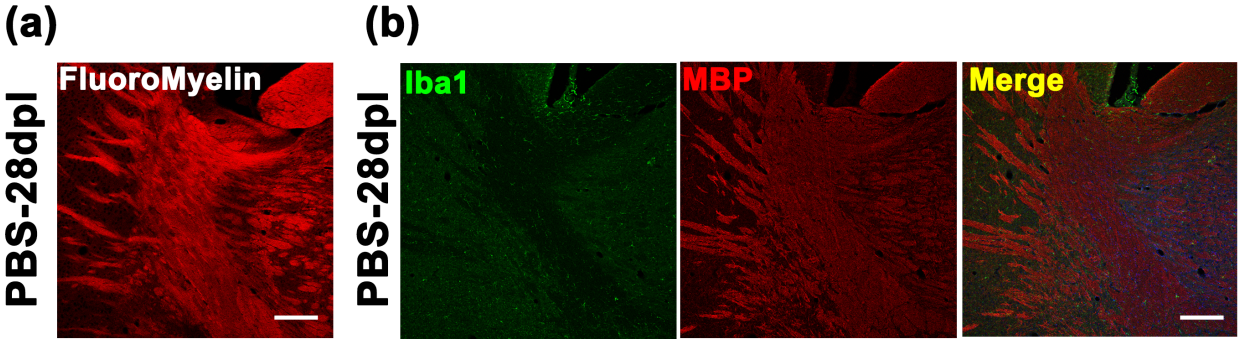

**Figure S1. PBS injected IC at 28 dpl.** (a) PBS injected IC at 28dpl shows intact FluoroMyelin staining (red). Scale bar: 200  $\mu$ m. (b) Double immunofluorescence using anti-Iba1 (green) and anti-MBP (red) antibodies shows undisturbed IC. Nuclei are counterstained with Hoechst (blue). Scale bar: 200  $\mu$ m.

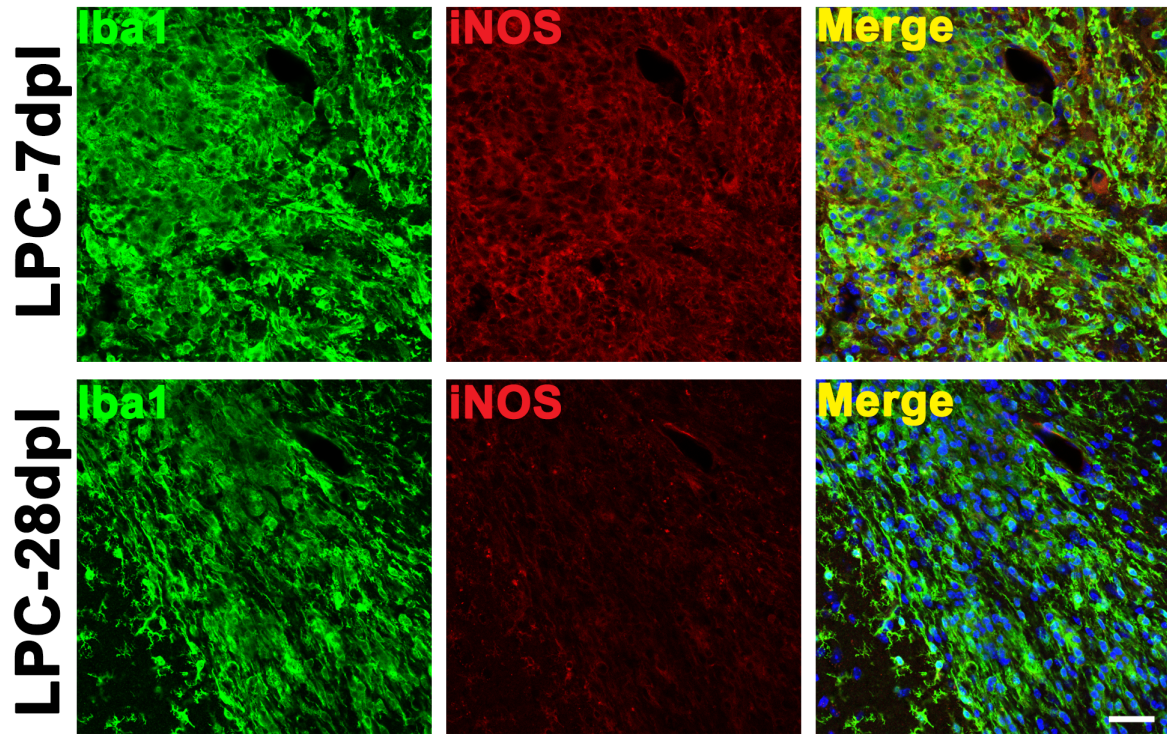

**Figure S2. Proinflammatory microglia/macrophage staining in LPC demyelinated lesion.** Double immunofluorescence images of brain sections of LPC-7dpi and LPC-28dpi using anti-Iba1 (green) and anti-iNOS (red) antibodies. Nuclei are counterstained with Hoechst (blue). Scale bar: 20  $\mu$ m.



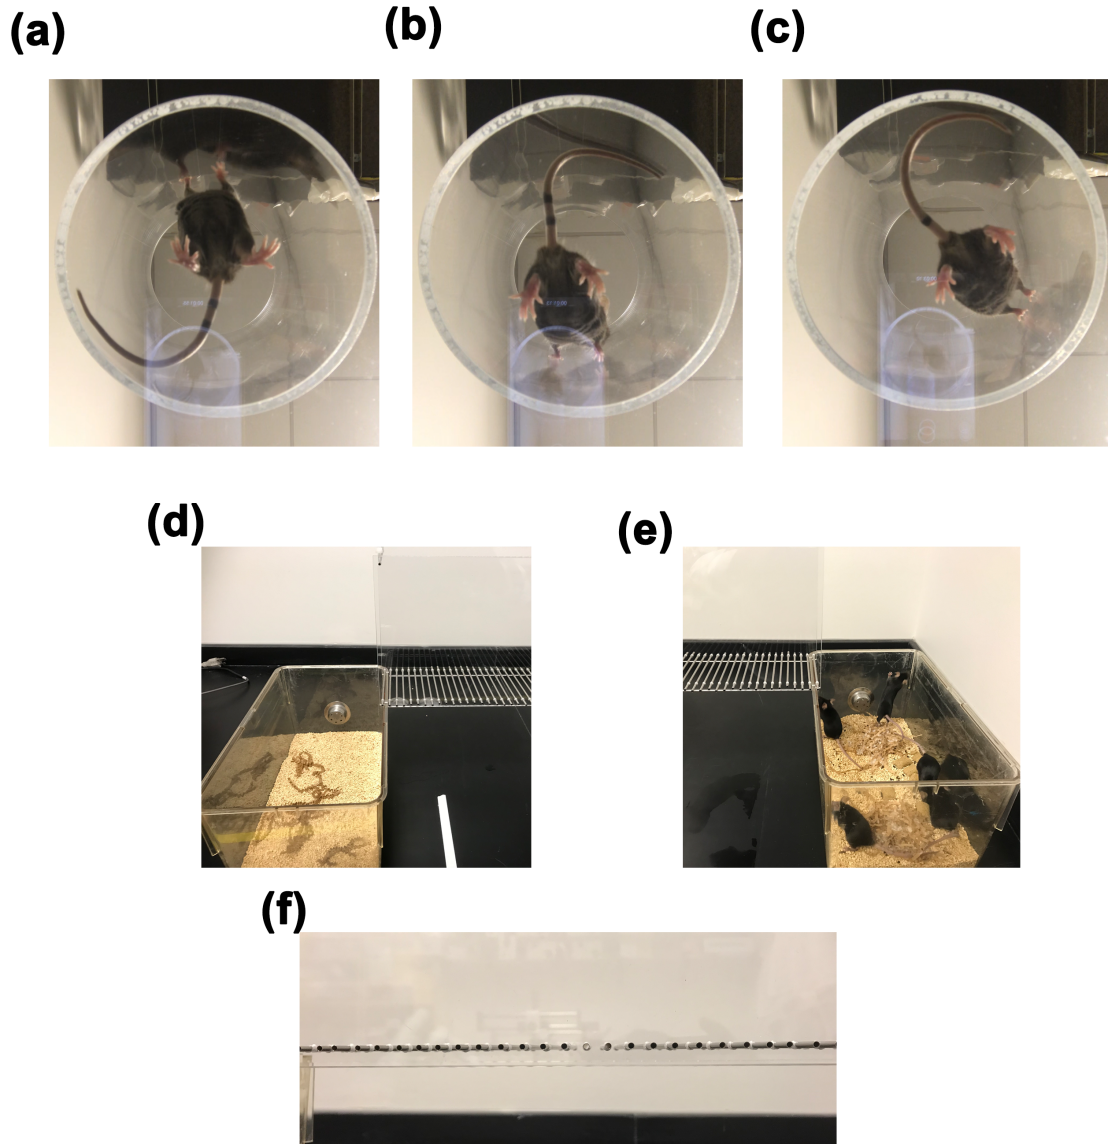

**Figure S3. Behavioral tests.** (a-c) Cylinder test (a) Representative picture of mouse using its right forepaw for weight support. (b) Representative picture of mouse using its left forepaw for weight support. (c) Representative picture of mouse using both forepaws for weight support. (d-f) Horizontal ladder test (d) Starting cage of ladder (e) Home cage of ladder (f) The picture of the horizontal ladder bar. When mice walk on the ladder, bars were changed to irregularly steps.

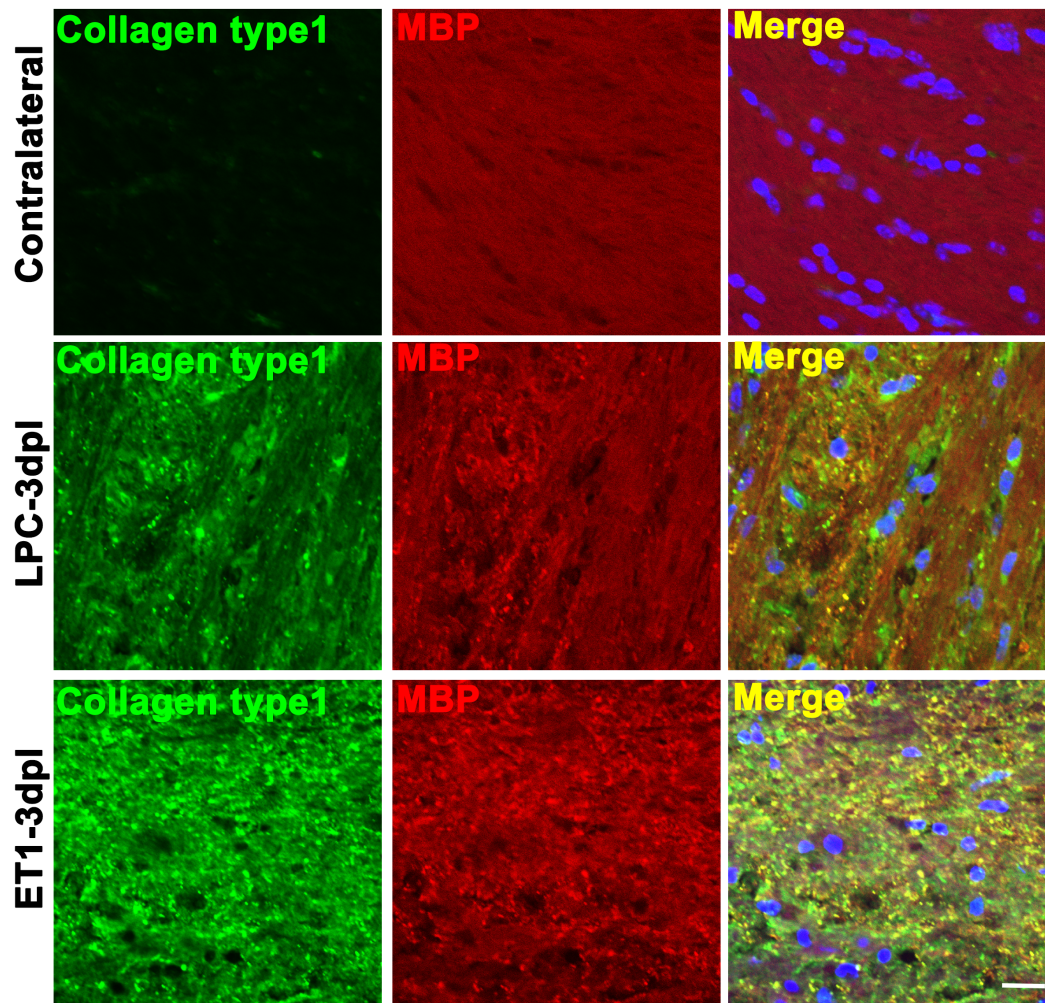

**Figure S4. Fibrosis staining in LPC and ET1 lesion.** Double immunofluorescence images of brain sections of LPC-3dpi and ET1-3dpi using anti-Collagen type1 (green) and anti-MBP (red) antibodies. Nuclei are counterstained with Hoechst (blue). Scale bar: 20  $\mu$ m.
